# Supplementary material for: Bone Status in a Mouse Model of Experimental Autoimmune-Orchitis
Source: MDPI journal article supplement (doi:10.3390/ijms22157858), 2021-07-23
Supplement: s1 [file s1]

# Bone Status in a Mouse Model of Experimental Autoimmune-Orchitis

Fabian Hemm, Monika Fijak, Jan Belikan, Marian Kampschulte, Thaif El Khassawna, Adrian Pilatz, Christian Heiss, Katrin S. Lips

## Supplementary Materials

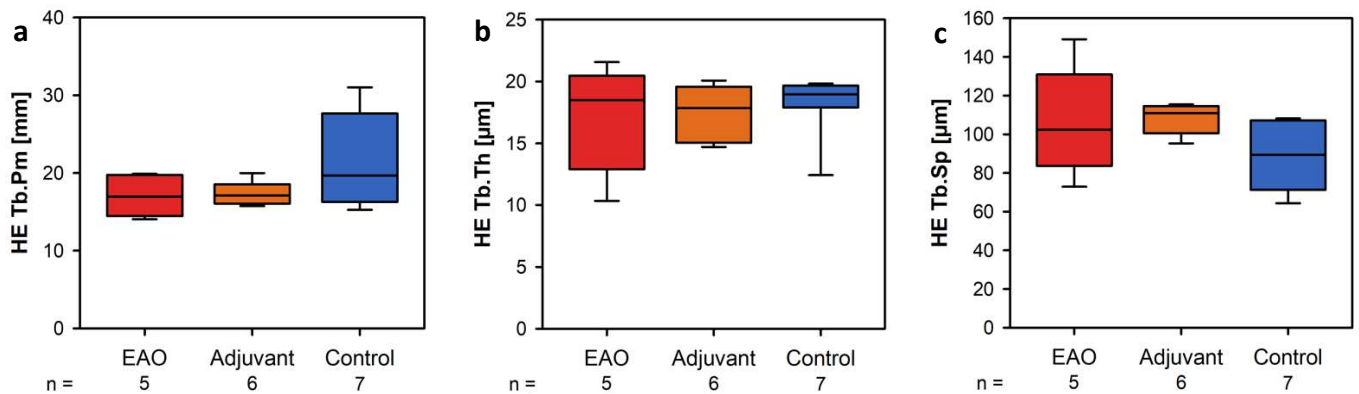

**Figure S1.** Histomorphometrical results of vertebral bodies L3 stained with hematoxylin-eosin (HE). Measurement of (a) trabecular perimeter (Tb.Pm), (b) trabecular thickness (Tb.Th) and (c) trabecular separation (Tb.Sp). Mice were immunized with testicular homogenate in adjuvant (EAO), adjuvant alone (adjuvant) or remained untreated (control).

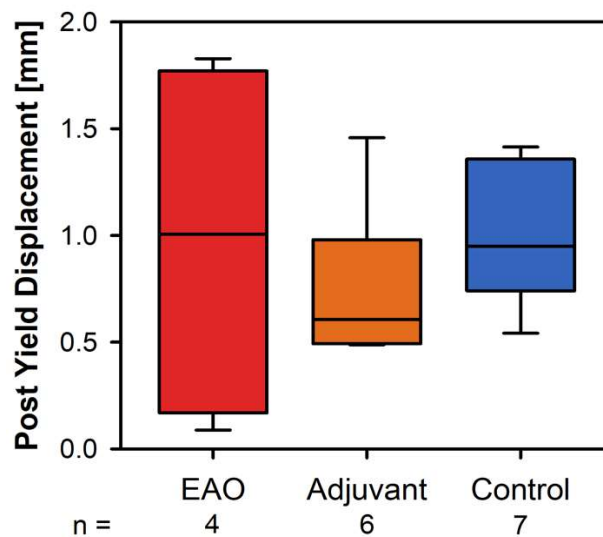

**Figure S2.** Post yield displacement of femora in the three-point bending test. Mice were immunized with testicular homogenate in adjuvant (EAO), adjuvant alone (adjuvant) or remained untreated (control).

**Table S1.** Detailed results of histomorphometrical analysis of vertebral bodies L3 stained with hematoxylin-eosin (HE). Measurement of bone area (B.Ar), trabecular perimeter (Tb.Pm), trabecular thickness (Tb.Th) and trabecular separation (Tb.Sp). Mice were immunized with testicular homogenate in adjuvant (EAO), adjuvant alone (adjuvant) or remained untreated (control). Data represent mean ( $\bar{x}$ )  $\pm$  standard error of mean (SEM), lower quartile (Q<sub>1</sub>), median quartile (Q<sub>2</sub>), upper quartile (Q<sub>3</sub>) and interquartile range (IQR).

| Parameter | Statistic                | Unit            | EAO<br>(n = 5)       | Adjuvant<br>(n = 6) | Control<br>(n = 7) | p-values        |                  |                   |
|-----------|--------------------------|-----------------|----------------------|---------------------|--------------------|-----------------|------------------|-------------------|
|           |                          |                 |                      |                     |                    | EAO vs.<br>Adj. | EAO vs.<br>Cont. | Adj. vs.<br>Cont. |
| B.Ar      | $\bar{x} \pm \text{SEM}$ | mm <sup>2</sup> | 0.361 $\pm$ 0.020    | 0.453 $\pm$ 0.043   | 0.594 $\pm$ 0.048  | 0.491           | 0.005            | 0.080             |
|           | Q <sub>1</sub>           | mm <sup>2</sup> | 0.326                | 0.352               | 0.539              |                 |                  |                   |
|           | Q <sub>2</sub> (IQR)     | mm <sup>2</sup> | 0.347 (0.078)        | 0.460 (0.203)       | 0.600 (0.081)      |                 |                  |                   |
|           | Q <sub>3</sub>           | mm <sup>2</sup> | 0.404                | 0.555               | 0.620              |                 |                  |                   |
| Tb.Pm     | $\bar{x} \pm \text{SEM}$ | mm              | 17.082 $\pm$ 1.190   | 17.358 $\pm$ 0.658  | 21.550 $\pm$ 2.274 | 0.715           | 0.167            | 0.253             |
|           | Q <sub>1</sub>           | mm              | 14.469               | 16.053              | 16.275             |                 |                  |                   |
|           | Q <sub>2</sub> (IQR)     | mm              | 16.963 (5.288)       | 17.087 (2.500)      | 19.689 (11.394)    |                 |                  |                   |
|           | Q <sub>3</sub>           | mm              | 19.757               | 18.553              | 27.669             |                 |                  |                   |
| Tb.Th     | $\bar{x} \pm \text{SEM}$ | $\mu\text{m}$   | 17.050 $\pm$ 1.942   | 17.509 $\pm$ 0.904  | 18.024 $\pm$ 0.971 | 0.855           | 0.808            | 0.668             |
|           | Q <sub>1</sub>           | $\mu\text{m}$   | 16.225               | 14.929              | 17.894             |                 |                  |                   |
|           | Q <sub>2</sub> (IQR)     | $\mu\text{m}$   | 18.934 (4.798)       | 18.405 (4.821)      | 18.971 (1.776)     |                 |                  |                   |
|           | Q <sub>3</sub>           | $\mu\text{m}$   | 21.023               | 19.750              | 19.670             |                 |                  |                   |
| Tb.Sp     | $\bar{x} \pm \text{SEM}$ | $\mu\text{m}$   | 106.298 $\pm$ 12.552 | 108.196 $\pm$ 3.266 | 87.265 $\pm$ 6.338 | 1.000           | 0.176            | 0.109             |
|           | Q <sub>1</sub>           | $\mu\text{m}$   | 80.243               | 98.797              | 71.252             |                 |                  |                   |
|           | Q <sub>2</sub> (IQR)     | $\mu\text{m}$   | 107.528 (59.804)     | 108.247 (15.716)    | 89.435 (35.950)    |                 |                  |                   |
|           | Q <sub>3</sub>           | $\mu\text{m}$   | 140.046              | 114.513             | 107.202            |                 |                  |                   |

**Table S2.** Detailed results regarding  $\mu\text{CT}$  investigation of mid diaphyseal femur cortex. Measurement of cortical thickness (Ct.Th), cortical surface (Ct.S), cortical surface/volume ratio (Ct.S/Ct.V), bone mineral density (BMD) and tissue mineral density (TMD). Mice were immunized with testicular homogenate in adjuvant (EAO), adjuvant alone (adjuvant) or remained untreated (control). Data represent mean ( $\bar{x}$ )  $\pm$  standard error of mean (SEM), lower quartile (Q<sub>1</sub>), median quartile (Q<sub>2</sub>), upper quartile (Q<sub>3</sub>) and interquartile range (IQR).

| Parameter | Statistic                | Unit              | EAO<br>(n = 5)     | Adjuvant<br>(n = 6) | Control<br>(n = 7) | p-values        |                  |                   |
|-----------|--------------------------|-------------------|--------------------|---------------------|--------------------|-----------------|------------------|-------------------|
|           |                          |                   |                    |                     |                    | EAO vs.<br>Adj. | EAO vs.<br>Cont. | Adj. vs.<br>Cont. |
| Ct.Th     | $\bar{x} \pm \text{SEM}$ | mm                | 0.147 $\pm$ 0.005  | 0.155 $\pm$ 0.005   | 0.210 $\pm$ 0.007  | 1.000           | 0.000            | 0.000             |
|           | Q <sub>1</sub>           | mm                | 0.138              | 0.143               | 0.189              |                 |                  |                   |
|           | Q <sub>2</sub> (IQR)     | mm                | 0.152 (0.016)      | 0.157 (0.025)       | 0.214 (0.034)      |                 |                  |                   |
|           | Q <sub>3</sub>           | mm                | 0.154              | 0.168               | 0.223              |                 |                  |                   |
| Ct.S      | $\bar{x} \pm \text{SEM}$ | mm <sup>2</sup>   | 10.538 $\pm$ 0.163 | 9.530 $\pm$ 0.238   | 10.270 $\pm$ 0.235 | 0.026           | 1.000            | 0.087             |
|           | Q <sub>1</sub>           | mm <sup>2</sup>   | 10.215             | 8.917               | 9.866              |                 |                  |                   |
|           | Q <sub>2</sub> (IQR)     | mm <sup>2</sup>   | 10.552 (0.639)     | 9.560 (1.216)       | 10.307 (0.896)     |                 |                  |                   |
|           | Q <sub>3</sub>           | mm <sup>2</sup>   | 10.854             | 10.133              | 10.762             |                 |                  |                   |
| Ct.S/Ct.V | $\bar{x} \pm \text{SEM}$ | mm <sup>-1</sup>  | 18.588 $\pm$ 0.608 | 17.594 $\pm$ 0.549  | 13.670 $\pm$ 0.326 | 0.553           | 0.000            | 0.000             |
|           | Q <sub>1</sub>           | mm <sup>-1</sup>  | 17.806             | 16.314              | 13.098             |                 |                  |                   |
|           | Q <sub>2</sub> (IQR)     | mm <sup>-1</sup>  | 17.812 (1.953)     | 17.361 (2.584)      | 13.553 (1.728)     |                 |                  |                   |
|           | Q <sub>3</sub>           | mm <sup>-1</sup>  | 19.759             | 18.898              | 14.825             |                 |                  |                   |
| BMD       | $\bar{x} \pm \text{SEM}$ | g/cm <sup>3</sup> | 1.164 $\pm$ 0.010  | 1.270 $\pm$ 0.045   | 1.280 $\pm$ 0.006  | 0.163           | 0.000            | 0.993             |
|           | Q <sub>1</sub>           | g/cm <sup>3</sup> | 1.147              | 1.207               | 1.272              |                 |                  |                   |
|           | Q <sub>2</sub> (IQR)     | g/cm <sup>3</sup> | 1.168 (0.032)      | 1.232 (0.110)       | 1.287 (0.021)      |                 |                  |                   |
|           | Q <sub>3</sub>           | g/cm <sup>3</sup> | 1.180              | 1.317               | 1.293              |                 |                  |                   |
| TMD       | $\bar{x} \pm \text{SEM}$ | g/cm <sup>3</sup> | 1.480 $\pm$ 0.004  | 1.531 $\pm$ 0.015   | 1.537 $\pm$ 0.005  | 0.053           | 0.000            | 0.974             |
|           | Q <sub>1</sub>           | g/cm <sup>3</sup> | 1.473              | 1.496               | 1.526              |                 |                  |                   |
|           | Q <sub>2</sub> (IQR)     | g/cm <sup>3</sup> | 1.478 (0.016)      | 1.547 (0.064)       | 1.535 (0.025)      |                 |                  |                   |
|           | Q <sub>3</sub>           | g/cm <sup>3</sup> | 1.489              | 1.559               | 1.551              |                 |                  |                   |

**Table S3.** Detailed results regarding  $\mu$ CT investigation of distal diaphyseal femur cortex. Measurement of cortical thickness (Ct.Th), cortical surface (Ct.S), cortical surface/volume ratio (Ct.S/Ct.V), bone mineral density (BMD) and tissue mineral density (TMD). Mice were immunized with testicular homogenate in adjuvant (EAO), adjuvant alone (adjuvant) or remained untreated (control). Data represent mean ( $\bar{x}$ )  $\pm$  standard error of mean (SEM), lower quartile (Q<sub>1</sub>), median quartile (Q<sub>2</sub>), upper quartile (Q<sub>3</sub>) and interquartile range (IQR).

| Parameter | Statistic                | Unit              | EAO<br>(n = 5)     | Adjuvant<br>(n = 6) | Control<br>(n = 7) | p-values        |                  |                   |
|-----------|--------------------------|-------------------|--------------------|---------------------|--------------------|-----------------|------------------|-------------------|
|           |                          |                   |                    |                     |                    | EAO vs.<br>Adj. | EAO vs.<br>Cont. | Adj. vs.<br>Cont. |
| Ct.Th     | $\bar{x} \pm \text{SEM}$ | mm                | 0.113 $\pm$ 0.004  | 0.125 $\pm$ 0.005   | 0.165 $\pm$ 0.002  | 0.114           | 0.000            | 0.000             |
|           | Q <sub>1</sub>           | mm                | 0.105              | 0.113               | 0.159              |                 |                  |                   |
|           | Q <sub>2</sub> (IQR)     | mm                | 0.111 (0.017)      | 0.127 (0.023)       | 0.167 (0.009)      |                 |                  |                   |
|           | Q <sub>3</sub>           | mm                | 0.122              | 0.136               | 0.168              |                 |                  |                   |
| Ct.S      | $\bar{x} \pm \text{SEM}$ | mm <sup>2</sup>   | 13.012 $\pm$ 0.274 | 11.556 $\pm$ 0.326  | 12.686 $\pm$ 0.438 | 0.059           | 1.000            | 0.131             |
|           | Q <sub>1</sub>           | mm <sup>2</sup>   | 12.449             | 10.745              | 11.704             |                 |                  |                   |
|           | Q <sub>2</sub> (IQR)     | mm <sup>2</sup>   | 13.058 (1.104)     | 11.787 (1.459)      | 13.138 (1.602)     |                 |                  |                   |
|           | Q <sub>3</sub>           | mm <sup>2</sup>   | 13.553             | 12.204              | 13.305             |                 |                  |                   |
| Ct.S/Ct.V | $\bar{x} \pm \text{SEM}$ | mm <sup>-1</sup>  | 24.713 $\pm$ 0.982 | 22.396 $\pm$ 0.915  | 17.706 $\pm$ 0.152 | 0.268           | 0.004            | 0.009             |
|           | Q <sub>1</sub>           | mm <sup>-1</sup>  | 22.662             | 20.616              | 17.536             |                 |                  |                   |
|           | Q <sub>2</sub> (IQR)     | mm <sup>-1</sup>  | 25.291 (4.063)     | 21.724 (3.841)      | 17.605 (0.324)     |                 |                  |                   |
|           | Q <sub>3</sub>           | mm <sup>-1</sup>  | 26.725             | 24.456              | 17.860             |                 |                  |                   |
| BMD       | $\bar{x} \pm \text{SEM}$ | g/cm <sup>3</sup> | 0.944 $\pm$ 0.015  | 0.993 $\pm$ 0.020   | 1.055 $\pm$ 0.005  | 0.099           | 0.000            | 0.015             |
|           | Q <sub>1</sub>           | g/cm <sup>3</sup> | 0.911              | 0.972               | 1.047              |                 |                  |                   |
|           | Q <sub>2</sub> (IQR)     | g/cm <sup>3</sup> | 0.943 (0.068)      | 1.004 (0.053)       | 1.058 (0.015)      |                 |                  |                   |
|           | Q <sub>3</sub>           | g/cm <sup>3</sup> | 0.979              | 1.025               | 1.063              |                 |                  |                   |
| TMD       | $\bar{x} \pm \text{SEM}$ | g/cm <sup>3</sup> | 1.273 $\pm$ 0.012  | 1.309 $\pm$ 0.017   | 1.319 $\pm$ 0.005  | 0.165           | 0.047            | 1.000             |
|           | Q <sub>1</sub>           | g/cm <sup>3</sup> | 1.246              | 1.278               | 1.310              |                 |                  |                   |
|           | Q <sub>2</sub> (IQR)     | g/cm <sup>3</sup> | 1.286 (0.048)      | 1.324 (0.062)       | 1.320 (0.013)      |                 |                  |                   |
|           | Q <sub>3</sub>           | g/cm <sup>3</sup> | 1.294              | 1.340               | 1.323              |                 |                  |                   |

**Table S4.** Detailed results regarding  $\mu$ CT investigation of the trabecular region in femora. Measurement of trabecular number (Tb.N), trabecular thickness (Tb.Th), trabecular separation (Tb.Sp), bone volume fraction (BV/TV), bone surface density (BS/TV), specific bone surface (BS/BV), structure model index (SMI), trabecular pattern factor (Tb.Pf), bone mineral density (BMD) and tissue mineral density (TMD). Mice were immunized with testicular homogenate in adjuvant (EAO), adjuvant alone (adjuvant) or remained untreated (control). Data represent mean ( $\bar{x}$ )  $\pm$  standard error of mean (SEM), lower quartile (Q<sub>1</sub>), median quartile (Q<sub>2</sub>), upper quartile (Q<sub>3</sub>) and interquartile range (IQR).

| Parameter | Statistic                | Unit              | EAO<br>(n = 5)      | Adjuvant<br>(n = 6) | Control<br>(n = 7) | p-values        |                  |                   |
|-----------|--------------------------|-------------------|---------------------|---------------------|--------------------|-----------------|------------------|-------------------|
|           |                          |                   |                     |                     |                    | EAO vs.<br>Adj. | EAO vs.<br>Cont. | Adj. vs.<br>Cont. |
| Tb.N      | $\bar{x} \pm \text{SEM}$ | mm <sup>-1</sup>  | 1.171 $\pm$ 0.099   | 1.344 $\pm$ 0.133   | 2.771 $\pm$ 0.197  | 1.000           | 0.000            | 0.000             |
|           | Q <sub>1</sub>           | mm <sup>-1</sup>  | 0.975               | 1.049               | 2.558              |                 |                  |                   |
|           | Q <sub>2</sub> (IQR)     | mm <sup>-1</sup>  | 1.136 (0.411)       | 1.323 (0.540)       | 2.962 (0.615)      |                 |                  |                   |
|           | Q <sub>3</sub>           | mm <sup>-1</sup>  | 1.386               | 1.589               | 3.173              |                 |                  |                   |
| Tb.Th     | $\bar{x} \pm \text{SEM}$ | mm                | 0.038 $\pm$ 0.003   | 0.038 $\pm$ 0.002   | 0.048 $\pm$ 0.002  | 1.000           | 0.032            | 0.015             |
|           | Q <sub>1</sub>           | mm                | 0.032               | 0.034               | 0.041              |                 |                  |                   |
|           | Q <sub>2</sub> (IQR)     | mm                | 0.037 (0.013)       | 0.038 (0.006)       | 0.048 (0.011)      |                 |                  |                   |
|           | Q <sub>3</sub>           | mm                | 0.045               | 0.040               | 0.052              |                 |                  |                   |
| Tb.Sp     | $\bar{x} \pm \text{SEM}$ | mm                | 0.276 $\pm$ 0.006   | 0.256 $\pm$ 0.005   | 0.199 $\pm$ 0.006  | 0.090           | 0.000            | 0.000             |
|           | Q <sub>1</sub>           | mm                | 0.264               | 0.248               | 0.190              |                 |                  |                   |
|           | Q <sub>2</sub> (IQR)     | mm                | 0.275 (0.025)       | 0.255 (0.018)       | 0.192 (0.015)      |                 |                  |                   |
|           | Q <sub>3</sub>           | mm                | 0.289               | 0.266               | 0.206              |                 |                  |                   |
| BV/TV     | $\bar{x} \pm \text{SEM}$ | %                 | 4.452 $\pm$ 0.447   | 5.065 $\pm$ 0.566   | 13.340 $\pm$ 1.283 | 0.782           | 0.001            | 0.001             |
|           | Q <sub>1</sub>           | %                 | 3.509               | 3.691               | 10.098             |                 |                  |                   |
|           | Q <sub>2</sub> (IQR)     | %                 | 4.254 (1.984)       | 4.932 (2.524)       | 15.006 (5.367)     |                 |                  |                   |
|           | Q <sub>3</sub>           | %                 | 5.493               | 6.216               | 15.465             |                 |                  |                   |
| BS/TV     | $\bar{x} \pm \text{SEM}$ | mm <sup>-1</sup>  | 4.427 $\pm$ 0.335   | 5.171 $\pm$ 0.440   | 10.340 $\pm$ 0.698 | 1.000           | 0.000            | 0.000             |
|           | Q <sub>1</sub>           | mm <sup>-1</sup>  | 3.781               | 4.186               | 9.512              |                 |                  |                   |
|           | Q <sub>2</sub> (IQR)     | mm <sup>-1</sup>  | 4.174 (1.418)       | 5.098 (1.756)       | 11.047 (2.197)     |                 |                  |                   |
|           | Q <sub>3</sub>           | mm <sup>-1</sup>  | 5.199               | 5.942               | 11.708             |                 |                  |                   |
| BS/BV     | $\bar{x} \pm \text{SEM}$ | mm <sup>-1</sup>  | 101.214 $\pm$ 6.639 | 103.878 $\pm$ 4.293 | 79.430 $\pm$ 3.681 | 1.000           | 0.017            | 0.005             |
|           | Q <sub>1</sub>           | mm <sup>-1</sup>  | 86.951              | 94.824              | 71.430             |                 |                  |                   |
|           | Q <sub>2</sub> (IQR)     | mm <sup>-1</sup>  | 99.656 (29.306)     | 102.082 (20.633)    | 77.165 (20.493)    |                 |                  |                   |
|           | Q <sub>3</sub>           | mm <sup>-1</sup>  | 116.257             | 115.457             | 91.923             |                 |                  |                   |
| SMI       | $\bar{x} \pm \text{SEM}$ |                   | 2.252 $\pm$ 0.087   | 2.231 $\pm$ 0.100   | 1.699 $\pm$ 0.102  | 1.000           | 0.004            | 0.004             |
|           | Q <sub>1</sub>           |                   | 2.112               | 2.004               | 1.499              |                 |                  |                   |
|           | Q <sub>2</sub> (IQR)     |                   | 2.212 (0.299)       | 2.227 (0.466)       | 1.585 (0.348)      |                 |                  |                   |
|           | Q <sub>3</sub>           |                   | 2.411               | 2.469               | 1.847              |                 |                  |                   |
| Tb.Pf     | $\bar{x} \pm \text{SEM}$ | mm <sup>-1</sup>  | 37.822 $\pm$ 2.271  | 38.736 $\pm$ 2.703  | 22.782 $\pm$ 2.360 | 1.000           | 0.002            | 0.001             |
|           | Q <sub>1</sub>           | mm <sup>-1</sup>  | 33.323              | 32.496              | 18.864             |                 |                  |                   |
|           | Q <sub>2</sub> (IQR)     | mm <sup>-1</sup>  | 36.131 (9.843)      | 37.852 (12.877)     | 20.286 (10.133)    |                 |                  |                   |
|           | Q <sub>3</sub>           | mm <sup>-1</sup>  | 43.166              | 45.373              | 28.997             |                 |                  |                   |
| BMD       | $\bar{x} \pm \text{SEM}$ | g/cm <sup>3</sup> | 0.078 $\pm$ 0.006   | 0.091 $\pm$ 0.008   | 0.205 $\pm$ 0.016  | 1.000           | 0.000            | 0.000             |
|           | Q <sub>1</sub>           | g/cm <sup>3</sup> | 0.067               | 0.074               | 0.164              |                 |                  |                   |
|           | Q <sub>2</sub> (IQR)     | g/cm <sup>3</sup> | 0.073 (0.024)       | 0.087 (0.035)       | 0.226 (0.069)      |                 |                  |                   |
|           | Q <sub>3</sub>           | g/cm <sup>3</sup> | 0.091               | 0.110               | 0.233              |                 |                  |                   |
| TMD       | $\bar{x} \pm \text{SEM}$ | g/cm <sup>3</sup> | 0.922 $\pm$ 0.018   | 0.931 $\pm$ 0.012   | 1.002 $\pm$ 0.012  | 1.000           | 0.003            | 0.004             |
|           | Q <sub>1</sub>           | g/cm <sup>3</sup> | 0.883               | 0.911               | 0.966              |                 |                  |                   |
|           | Q <sub>2</sub> (IQR)     | g/cm <sup>3</sup> | 0.933 (0.073)       | 0.939 (0.042)       | 1.016 (0.059)      |                 |                  |                   |
|           | Q <sub>3</sub>           | g/cm <sup>3</sup> | 0.956               | 0.953               | 1.025              |                 |                  |                   |

**Table S5.** Detailed results regarding  $\mu$ CT investigation of the trabecular region in vertebral bodies L1. Measurement of trabecular number (Tb.N), trabecular thickness (Tb.Th), trabecular separation (Tb.Sp), bone volume fraction (BV/TV), bone surface density (BS/TV), specific bone surface (BS/BV), structure model index (SMI), trabecular pattern factor (Tb.Pf), bone mineral density (BMD) and tissue mineral density (TMD). Mice were immunized with testicular homogenate in adjuvant (EAO), adjuvant alone (adjuvant) or remained untreated (control). Data represent mean ( $\bar{x}$ )  $\pm$  standard error of mean (SEM), lower quartile ( $Q_1$ ), median quartile ( $Q_2$ ), upper quartile ( $Q_3$ ) and interquartile range (IQR).

| Parameter | Statistic                | Unit              | EAO<br>(n = 5)     | Adjuvant<br>(n = 6) | Control<br>(n = 7) | p-values        |                  |                   |
|-----------|--------------------------|-------------------|--------------------|---------------------|--------------------|-----------------|------------------|-------------------|
|           |                          |                   |                    |                     |                    | EAO vs.<br>Adj. | EAO vs.<br>Cont. | Adj. vs.<br>Cont. |
| Tb.N      | $\bar{x} \pm \text{SEM}$ | mm <sup>-1</sup>  | 3.488 $\pm$ 0.215  | 4.131 $\pm$ 0.123   | 5.243 $\pm$ 0.176  | 0.072           | 0.000            | 0.001             |
|           | $Q_1$                    | mm <sup>-1</sup>  | 3.046              | 3.900               | 4.917              |                 |                  |                   |
|           | $Q_2$ (IQR)              | mm <sup>-1</sup>  | 3.496 (0.881)      | 4.137 (0.438)       | 5.187 (0.667)      |                 |                  |                   |
|           | $Q_3$                    | mm <sup>-1</sup>  | 3.927              | 4.338               | 5.584              |                 |                  |                   |
| Tb.Th     | $\bar{x} \pm \text{SEM}$ | mm                | 0.038 $\pm$ 0.001  | 0.041 $\pm$ 0.001   | 0.046 $\pm$ 0.001  | 0.044           | 0.000            | 0.000             |
|           | $Q_1$                    | mm                | 0.036              | 0.039               | 0.044              |                 |                  |                   |
|           | $Q_2$ (IQR)              | mm                | 0.038 (0.003)      | 0.041 (0.002)       | 0.046 (0.004)      |                 |                  |                   |
|           | $Q_3$                    | mm                | 0.039              | 0.042               | 0.048              |                 |                  |                   |
| Tb.Sp     | $\bar{x} \pm \text{SEM}$ | mm                | 0.179 $\pm$ 0.008  | 0.164 $\pm$ 0.003   | 0.147 $\pm$ 0.006  | 0.318           | 0.004            | 0.113             |
|           | $Q_1$                    | mm                | 0.163              | 0.157               | 0.133              |                 |                  |                   |
|           | $Q_2$ (IQR)              | mm                | 0.177 (0.031)      | 0.166 (0.013)       | 0.143 (0.020)      |                 |                  |                   |
|           | $Q_3$                    | mm                | 0.195              | 0.170               | 0.154              |                 |                  |                   |
| BV/TV     | $\bar{x} \pm \text{SEM}$ | %                 | 13.154 $\pm$ 0.711 | 16.856 $\pm$ 0.628  | 24.056 $\pm$ 1.132 | 0.011           | 0.000            | 0.001             |
|           | $Q_1$                    | %                 | 11.502             | 15.845              | 21.505             |                 |                  |                   |
|           | $Q_2$ (IQR)              | %                 | 13.661 (3.050)     | 16.937 (1.946)      | 25.229 (4.704)     |                 |                  |                   |
|           | $Q_3$                    | %                 | 14.552             | 17.791              | 26.210             |                 |                  |                   |
| BS/TV     | $\bar{x} \pm \text{SEM}$ | mm <sup>-1</sup>  | 11.951 $\pm$ 0.659 | 13.868 $\pm$ 0.342  | 17.149 $\pm$ 0.535 | 0.075           | 0.000            | 0.001             |
|           | $Q_1$                    | mm <sup>-1</sup>  | 10.545             | 13.127              | 16.306             |                 |                  |                   |
|           | $Q_2$ (IQR)              | mm <sup>-1</sup>  | 12.180 (2.699)     | 13.877 (1.546)      | 17.211 (1.936)     |                 |                  |                   |
|           | $Q_3$                    | mm <sup>-1</sup>  | 13.244             | 14.673              | 18.242             |                 |                  |                   |
| BS/BV     | $\bar{x} \pm \text{SEM}$ | mm <sup>-1</sup>  | 90.882 $\pm$ 1.376 | 82.504 $\pm$ 1.489  | 71.647 $\pm$ 1.474 | 0.005           | 0.000            | 0.000             |
|           | $Q_1$                    | mm <sup>-1</sup>  | 88.529             | 78.678              | 68.219             |                 |                  |                   |
|           | $Q_2$ (IQR)              | mm <sup>-1</sup>  | 89.346 (5.474)     | 83.198 (6.381)      | 70.618 (7.434)     |                 |                  |                   |
|           | $Q_3$                    | mm <sup>-1</sup>  | 94.003             | 85.059              | 75.653             |                 |                  |                   |
| SMI       | $\bar{x} \pm \text{SEM}$ |                   | 1.400 $\pm$ 0.033  | 1.188 $\pm$ 0.054   | 0.876 $\pm$ 0.061  | 0.056           | 0.000            | 0.002             |
|           | $Q_1$                    |                   | 1.321              | 1.095               | 0.719              |                 |                  |                   |
|           | $Q_2$ (IQR)              |                   | 1.437 (0.139)      | 1.189 (0.217)       | 0.887 (0.286)      |                 |                  |                   |
|           | $Q_3$                    |                   | 1.460              | 1.313               | 1.005              |                 |                  |                   |
| Tb.Pf     | $\bar{x} \pm \text{SEM}$ | mm <sup>-1</sup>  | 21.194 $\pm$ 0.562 | 16.390 $\pm$ 1.011  | 10.544 $\pm$ 0.927 | 0.008           | 0.000            | 0.001             |
|           | $Q_1$                    | mm <sup>-1</sup>  | 20.020             | 14.367              | 8.121              |                 |                  |                   |
|           | $Q_2$ (IQR)              | mm <sup>-1</sup>  | 21.353 (2.270)     | 16.495 (4.232)      | 10.081 (4.549)     |                 |                  |                   |
|           | $Q_3$                    | mm <sup>-1</sup>  | 22.290             | 18.600              | 12.670             |                 |                  |                   |
| BMD       | $\bar{x} \pm \text{SEM}$ | g/cm <sup>3</sup> | 0.173 $\pm$ 0.009  | 0.216 $\pm$ 0.011   | 0.308 $\pm$ 0.014  | 0.080           | 0.000            | 0.000             |
|           | $Q_1$                    | g/cm <sup>3</sup> | 0.152              | 0.197               | 0.282              |                 |                  |                   |
|           | $Q_2$ (IQR)              | g/cm <sup>3</sup> | 0.180 (0.037)      | 0.210 (0.038)       | 0.321 (0.044)      |                 |                  |                   |
|           | $Q_3$                    | g/cm <sup>3</sup> | 0.190              | 0.235               | 0.326              |                 |                  |                   |
| TMD       | $\bar{x} \pm \text{SEM}$ | g/cm <sup>3</sup> | 0.883 $\pm$ 0.004  | 0.908 $\pm$ 0.012   | 0.995 $\pm$ 0.008  | 0.245           | 0.000            | 0.000             |
|           | $Q_1$                    | g/cm <sup>3</sup> | 0.872              | 0.874               | 0.980              |                 |                  |                   |
|           | $Q_2$ (IQR)              | g/cm <sup>3</sup> | 0.889 (0.018)      | 0.915 (0.058)       | 0.981 (0.027)      |                 |                  |                   |
|           | $Q_3$                    | g/cm <sup>3</sup> | 0.890              | 0.932               | 1.007              |                 |                  |                   |

**Table S6.** Detailed results of parameters regarding osteoblasts. Histomorphometrical calculation of relative ALP perimeter (ALP.Pm/Tb.Pm) in enzyme histochemical stained vertebral bodies L3. mRNA expression of ALP and collagen 1 $\alpha$ 1 (Col1 $\alpha$ 1) in real-time RT-PCR of vertebral bodies Th10 (normalized to mRNA expression of  $\beta$ -actin). Histomorphometrical calculation of relative osteoid area (O.Ar/B.Ar) in vertebral bodies L2 by Von Kossa/Van Gieson staining. Mice were immunized with testicular homogenate in adjuvant (EAO), adjuvant alone (adjuvant) or remained untreated (control). Data represent mean ( $\bar{x}$ )  $\pm$  standard error of mean (SEM), lower quartile (Q<sub>1</sub>), median quartile (Q<sub>2</sub>), upper quartile (Q<sub>3</sub>) and interquartile range (IQR).

| Parameter        | Statistic                | Unit               | EAO                | Adjuvant           | Control            | p-values     |               |                |
|------------------|--------------------------|--------------------|--------------------|--------------------|--------------------|--------------|---------------|----------------|
|                  |                          |                    |                    |                    |                    | EAO vs. Adj. | EAO vs. Cont. | Adj. vs. Cont. |
| ALP.Pm/<br>Tb.Pm | n                        |                    | 5                  | 6                  | 6                  |              |               |                |
|                  | $\bar{x} \pm \text{SEM}$ | %                  | 12.720 $\pm$ 1.841 | 21.298 $\pm$ 3.237 | 43.185 $\pm$ 4.818 | 0.386        | 0.000         | 0.002          |
|                  | Q <sub>1</sub>           | %                  | 9.432              | 13.026             | 34.742             |              |               |                |
|                  | Q <sub>2</sub> (IQR)     | %                  | 10.779 (7.546)     | 20.910 (16.508)    | 41.343 (15.548)    |              |               |                |
|                  | Q <sub>3</sub>           | %                  | 16.978             | 29.534             | 50.290             |              |               |                |
| ALP              | n                        |                    | 5                  | 6                  | 7                  |              |               |                |
|                  | $\bar{x} \pm \text{SEM}$ | $-\Delta\text{CP}$ | -9.034 $\pm$ 0.102 | -9.017 $\pm$ 0.106 | -8.461 $\pm$ 0.110 | 1.000        | 0.007         | 0.006          |
|                  | Q <sub>1</sub>           | $-\Delta\text{CP}$ | -9.225             | -9.315             | -8.760             |              |               |                |
|                  | Q <sub>2</sub> (IQR)     | $-\Delta\text{CP}$ | -9.020 (0.375 )    | -8.955 (0.532)     | -8.420 (0.590)     |              |               |                |
|                  | Q <sub>3</sub>           | $-\Delta\text{CP}$ | -8.850             | -8.783             | -8.170             |              |               |                |
| Col1 $\alpha$ 1  | n                        |                    | 5                  | 6                  | 7                  |              |               |                |
|                  | $\bar{x} \pm \text{SEM}$ | $-\Delta\text{CP}$ | -2.092 $\pm$ 0.256 | -2.490 $\pm$ 0.082 | -2.411 $\pm$ 0.143 | 0.357        | 0.570         | 1.000          |
|                  | Q <sub>1</sub>           | $-\Delta\text{CP}$ | -2.520             | -2.620             | -2.810             |              |               |                |
|                  | Q <sub>2</sub> (IQR)     | $-\Delta\text{CP}$ | -1.940 (0.780)     | -2.515 (0.328)     | -2.350 (0.700)     |              |               |                |
|                  | Q <sub>3</sub>           | $-\Delta\text{CP}$ | -1.740             | -2.293             | -2.110             |              |               |                |
| O.Ar/B.Ar        | n                        |                    | 4                  | 5                  | 7                  |              |               |                |
|                  | $\bar{x} \pm \text{SEM}$ | %                  | 21.674 $\pm$ 1.662 | 17.720 $\pm$ 4.299 | 15.695 $\pm$ 3.673 | 1.000        | 0.469         | 0.897          |
|                  | Q <sub>1</sub>           | %                  | 18.633             | 10.001             | 3.348              |              |               |                |
|                  | Q <sub>2</sub> (IQR)     | %                  | 21.359 (6.397)     | 17.874 (15.361)    | 19.556 (19.873)    |              |               |                |
|                  | Q <sub>3</sub>           | %                  | 25.030             | 25.362             | 23.221             |              |               |                |

**Table S7.** Detailed results of parameters regarding osteoclasts. Histomorphometrical calculation of number of TRAP positive cells per trabecular perimeter (TRAP.N/Tb.Pm) in enzyme histochemical stained vertebral bodies L3. mRNA expression of cathepsin K (CtsK), receptor activator of nuclear factor-kappa B ligand (RANKL) and osteoprotegerin (OPG) in real-time RT-PCR of vertebral bodies Th10 (normalized to mRNA expression of  $\beta$ -actin). Mice were immunized with testicular homogenate in adjuvant (EAO), adjuvant alone (adjuvant) or remained untreated (control). Data represent mean ( $\bar{x}$ )  $\pm$  standard error of mean (SEM), lower quartile ( $Q_1$ ), median quartile ( $Q_2$ ), upper quartile ( $Q_3$ ) and interquartile range (IQR).

| Parameter        | Statistic                | Unit               | EAO                 | Adjuvant            | Control             | p-values     |               |                |
|------------------|--------------------------|--------------------|---------------------|---------------------|---------------------|--------------|---------------|----------------|
|                  |                          |                    |                     |                     |                     | EAO vs. Adj. | EAO vs. Cont. | Adj. vs. Cont. |
| TRAP.N/<br>Tb.Pm | n                        |                    | 5                   | 6                   | 6                   |              |               |                |
|                  | $\bar{x} \pm \text{SEM}$ | n/mm               | $1.924 \pm 0.488$   | $1.933 \pm 0.407$   | $5.447 \pm 0.527$   | 1.000        | 0.000         | 0.000          |
|                  | $Q_1$                    | n/mm               | 1.048               | 1.049               | 4.729               |              |               |                |
|                  | $Q_2$ (IQR)              | n/mm               | 1.508 (1.957)       | 1.817 (1.859)       | 5.649 (1.634)       |              |               |                |
|                  | $Q_3$                    | n/mm               | 3.005               | 2.908               | 6.363               |              |               |                |
| CtsK             | n                        |                    | 5                   | 6                   | 7                   |              |               |                |
|                  | $\bar{x} \pm \text{SEM}$ | $-\Delta\text{CP}$ | $-4.522 \pm 0.292$  | $-4.097 \pm 0.129$  | $-3.754 \pm 0.159$  | 0.458        | 0.039         | 0.620          |
|                  | $Q_1$                    | $-\Delta\text{CP}$ | -5.065              | -4.370              | -4.070              |              |               |                |
|                  | $Q_2$ (IQR)              | $-\Delta\text{CP}$ | -4.310 (0.980)      | -4.085 (0.523)      | -3.860 (0.640)      |              |               |                |
|                  | $Q_3$                    | $-\Delta\text{CP}$ | -4.085              | -3.848              | -3.430              |              |               |                |
| RANKL            | n                        |                    | 5                   | 6                   | 7                   |              |               |                |
|                  | $\bar{x} \pm \text{SEM}$ | $-\Delta\text{CP}$ | $-11.292 \pm 0.088$ | $-11.192 \pm 0.085$ | $-10.816 \pm 0.237$ | 0.797        | 0.248         | 0.412          |
|                  | $Q_1$                    | $-\Delta\text{CP}$ | -11.470             | -11.385             | -11.420             |              |               |                |
|                  | $Q_2$ (IQR)              | $-\Delta\text{CP}$ | -11.340 (0.380)     | -11.200 (0.368)     | -11.090 (1.240)     |              |               |                |
|                  | $Q_3$                    | $-\Delta\text{CP}$ | -11.090             | -11.018             | -10.180             |              |               |                |
| OPG              | n                        |                    | 5                   | 6                   | 7                   |              |               |                |
|                  | $\bar{x} \pm \text{SEM}$ | $-\Delta\text{CP}$ | $-10.262 \pm 0.249$ | $-10.530 \pm 0.186$ | $-9.493 \pm 0.194$  | 1.000        | 0.062         | 0.007          |
|                  | $Q_1$                    | $-\Delta\text{CP}$ | -10.765             | -10.920             | -9.770              |              |               |                |
|                  | $Q_2$ (IQR)              | $-\Delta\text{CP}$ | -10.360 (1.055)     | -10.650 (0.820)     | -9.280 (0.650)      |              |               |                |
|                  | $Q_3$                    | $-\Delta\text{CP}$ | -9.710              | -10.100             | -9.120              |              |               |                |

**Table S8.** Detailed results of parameters regarding osteocytes and cell-contacts. mRNA expression of sclerostin (SOST) and connexin 43 (Cx43) in real-time RT-PCR of vertebral bodies Th10 (normalized to mRNA expression of  $\beta$ -actin). Mice were immunized with testicular homogenate in adjuvant (EAO), adjuvant alone (adjuvant) or remained untreated (control). Data represent mean ( $\bar{x}$ )  $\pm$  standard error of mean (SEM), lower quartile ( $Q_1$ ), median quartile ( $Q_2$ ), upper quartile ( $Q_3$ ) and interquartile range (IQR).

| Parameter | Statistic                | Unit               | EAO                 | Adjuvant            | Control             | p-values     |               |                |
|-----------|--------------------------|--------------------|---------------------|---------------------|---------------------|--------------|---------------|----------------|
|           |                          |                    | (n = 5)             | (n = 6)             | (n = 7)             | EAO vs. Adj. | EAO vs. Cont. | Adj. vs. Cont. |
| SOST      | $\bar{x} \pm \text{SEM}$ | $-\Delta\text{CP}$ | $-12.782 \pm 0.277$ | $-12.522 \pm 0.281$ | $-11.359 \pm 0.295$ | 1.000        | 0.011         | 0.030          |
|           | $Q_1$                    | $-\Delta\text{CP}$ | -13.370             | -13.130             | -11.970             |              |               |                |
|           | $Q_2$ (IQR)              | $-\Delta\text{CP}$ | -12.780 (1.175)     | -12.450 (1.133)     | -11.510 (1.200)     |              |               |                |
|           | $Q_3$                    | $-\Delta\text{CP}$ | -12.195             | -11.998             | -10.770             |              |               |                |
|           |                          |                    |                     |                     |                     |              |               |                |
| Cx43      | $\bar{x} \pm \text{SEM}$ | $-\Delta\text{CP}$ | $-8.530 \pm 0.164$  | $-8.100 \pm 0.097$  | $-7.759 \pm 0.122$  | 0.111        | 0.002         | 0.199          |
|           | $Q_1$                    | $-\Delta\text{CP}$ | -8.840              | -8.210              | -8.100              |              |               |                |
|           | $Q_2$ (IQR)              | $-\Delta\text{CP}$ | -8.450 (0.580)      | -8.060 (0.240)      | -7.860 (0.640)      |              |               |                |
|           | $Q_3$                    | $-\Delta\text{CP}$ | -8.260              | -7.970              | -7.460              |              |               |                |
|           |                          |                    |                     |                     |                     |              |               |                |

**Table S9.** Detailed results regarding biomechanical properties of femora in the three-point bending test. Measurement of maximum load, stiffness, post yield displacement and work to fracture. Mice were immunized with testicular homogenate in adjuvant (EAO), adjuvant alone (adjuvant) or remained untreated (control). Data represent mean ( $\bar{x}$ )  $\pm$  standard error of mean (SEM), lower quartile (Q<sub>1</sub>), median quartile (Q<sub>2</sub>), upper quartile (Q<sub>3</sub>) and interquartile range (IQR).

| Parameter               | Statistic                | Unit | EAO<br>(n = 4)     | Adjuvant<br>(n = 6) | Control<br>(n = 7) | p-values        |                  |                   |
|-------------------------|--------------------------|------|--------------------|---------------------|--------------------|-----------------|------------------|-------------------|
|                         |                          |      |                    |                     |                    | EAO vs.<br>Adj. | EAO vs.<br>Cont. | Adj. vs.<br>Cont. |
| Maximum Load            | $\bar{x} \pm \text{SEM}$ | N    | 8.234 $\pm$ 1.099  | 10.392 $\pm$ 1.086  | 15.984 $\pm$ 0.665 | 0.459           | 0.000            | 0.001             |
|                         | Q <sub>1</sub>           | N    | 6.106              | 7.471               | 14.255             |                 |                  |                   |
|                         | Q <sub>2</sub> (IQR)     | N    | 8.342 (4.147)      | 10.782 (5.094)      | 16.496 (3.651)     |                 |                  |                   |
|                         | Q <sub>3</sub>           | N    | 10.253             | 12.564              | 17.906             |                 |                  |                   |
| Stiffness               | $\bar{x} \pm \text{SEM}$ | N/mm | 39.331 $\pm$ 7.355 | 45.886 $\pm$ 8.284  | 66.980 $\pm$ 4.208 | 1.000           | 0.026            | 0.055             |
|                         | Q <sub>1</sub>           | N/mm | 30.223             | 30.375              | 61.076             |                 |                  |                   |
|                         | Q <sub>2</sub> (IQR)     | N/mm | 33.114 (24.434)    | 39.360 (30.169)     | 67.440 (18.950)    |                 |                  |                   |
|                         | Q <sub>3</sub>           | N/mm | 54.657             | 60.544              | 80.026             |                 |                  |                   |
| Post Yield Displacement | $\bar{x} \pm \text{SEM}$ | mm   | 0.982 $\pm$ 0.430  | 0.746 $\pm$ 0.151   | 0.968 $\pm$ 0.123  | 0.933           | 1.000            | 0.605             |
|                         | Q <sub>1</sub>           | mm   | 0.169              | 0.492               | 0.740              |                 |                  |                   |
|                         | Q <sub>2</sub> (IQR)     | mm   | 1.006 (1.602)      | 0.607 (0.489)       | 0.950 (0.618)      |                 |                  |                   |
|                         | Q <sub>3</sub>           | mm   | 1.771              | 0.981               | 1.358              |                 |                  |                   |
| Work To Fracture        | $\bar{x} \pm \text{SEM}$ | N*mm | 4.277 $\pm$ 1.421  | 5.566 $\pm$ 0.390   | 12.520 $\pm$ 1.380 | 1.000           | 0.001            | 0.001             |
|                         | Q <sub>1</sub>           | N*mm | 1.756              | 4.777               | 9.311              |                 |                  |                   |
|                         | Q <sub>2</sub> (IQR)     | N*mm | 3.958 (5.363)      | 5.398 (1.453)       | 12.255 (5.189)     |                 |                  |                   |
|                         | Q <sub>3</sub>           | N*mm | 7.119              | 6.230               | 14.500             |                 |                  |                   |

**Table S10.** Primer pairs used for real-time RT-PCR.

| Primer                       |                  | Sequence                       | Length [bp <sup>10</sup> ] | GenBank ID (accession) |
|------------------------------|------------------|--------------------------------|----------------------------|------------------------|
| ALP <sup>1</sup>             | for <sup>2</sup> | TCA GCT AAT GCA CAA TAT CAA GG | 87                         | NM_007431              |
|                              | rev <sup>3</sup> | TCC ACA TCA GTT CTG TTC TTC G  |                            |                        |
| Col1 $\alpha$ 1 <sup>4</sup> | for              | TGG CAT CCC TGG ACA GCC TG     | 144                        | NM_007742              |
|                              | rev              | ATG GGG CCA GGC ACG GAA AC     |                            |                        |
| CtsK <sup>5</sup>            | for              | GAG GCG GCT ATA TGA CCA CT     | 119                        | NM_007802              |
|                              | rev              | CTT TGC CGT GGC GTT ATA CA     |                            |                        |
| RANKL <sup>6</sup>           | for              | TCC TGT ACT TTC GAG CGC AG     | 136                        | NM_011613              |
|                              | rev              | TCA GGT AGT GTG TCT TCA CTC TC |                            |                        |
| OPG <sup>7</sup>             | for              | ACT TCA TCG AAA GCA CCC TGT    | 181                        | NM_008764              |
|                              | rev              | TGG TAG GAA CAG CAA ACC TGA    |                            |                        |
| SOST <sup>8</sup>            | for              | GCC TCC TCC TGA GAA CAA CC     | 143                        | NM_024449              |
|                              | rev              | GGC ATG GGC CGT CTG TC         |                            |                        |
| Cx43 <sup>9</sup>            | for              | TGC TTC CTC TCA CGT CCC AC     | 127                        | NM_010288              |
|                              | rev              | CGC GAT CCT TAA CGC CCT TG     |                            |                        |
| $\beta$ -actin               | for              | TGT TAC CAA CTG GGA CGA CA     | 165                        | NM_007393              |
|                              | rev              | GGG GTG TTG AAG GTC TCA AA     |                            |                        |

**Abbreviations:** <sup>1</sup> ALP: alkaline phosphatase, <sup>2</sup> for: forward, <sup>3</sup> rev: reverse, <sup>4</sup> Col1 $\alpha$ 1: collagen 1 $\alpha$ 1, <sup>5</sup> CtsK: cathepsin K, <sup>6</sup> RANKL: receptor activator of nuclear factor-kappa B ligand, <sup>7</sup> OPG: osteoprotegerin, <sup>8</sup> SOST: sclerostin, <sup>9</sup> Cx43: connexin 43, <sup>10</sup> bp: base pairs.
